# Supplementary material for: Tracking mesenchymal stem cell contributions to regeneration in an immunocompetent cartilage regeneration model
Source: JCI journal article supplement (doi:10.1172/jci.insight.87322), 2017-10-18
Supplement: sd1 [file 1]

# Supplementary material

## **Tracking mesenchymal stem cell contributions to regeneration in an immunocompetent cartilage regeneration model**

Daniela Zwolanek, María Satué, Verena Proell, José R. Godoy, Kathrin I. Odörfer, Magdalena Flicker, Sigrid Hoffmann, Thomas Rüllicke, and Reinhold G. Erben

### **Corresponding Author**

Reinhold G. Erben, MD, DVM

Institute of Physiology, Pathophysiology, and Biophysics

Department of Biomedical Sciences, University of Veterinary Medicine Vienna

Veterinärplatz 1, 1210 Vienna, Austria, Tel: +43-1-250 77-4550, Fax: +43-1-25077-4599,

E-mail: Reinhold.Erben@vetmeduni.ac.at

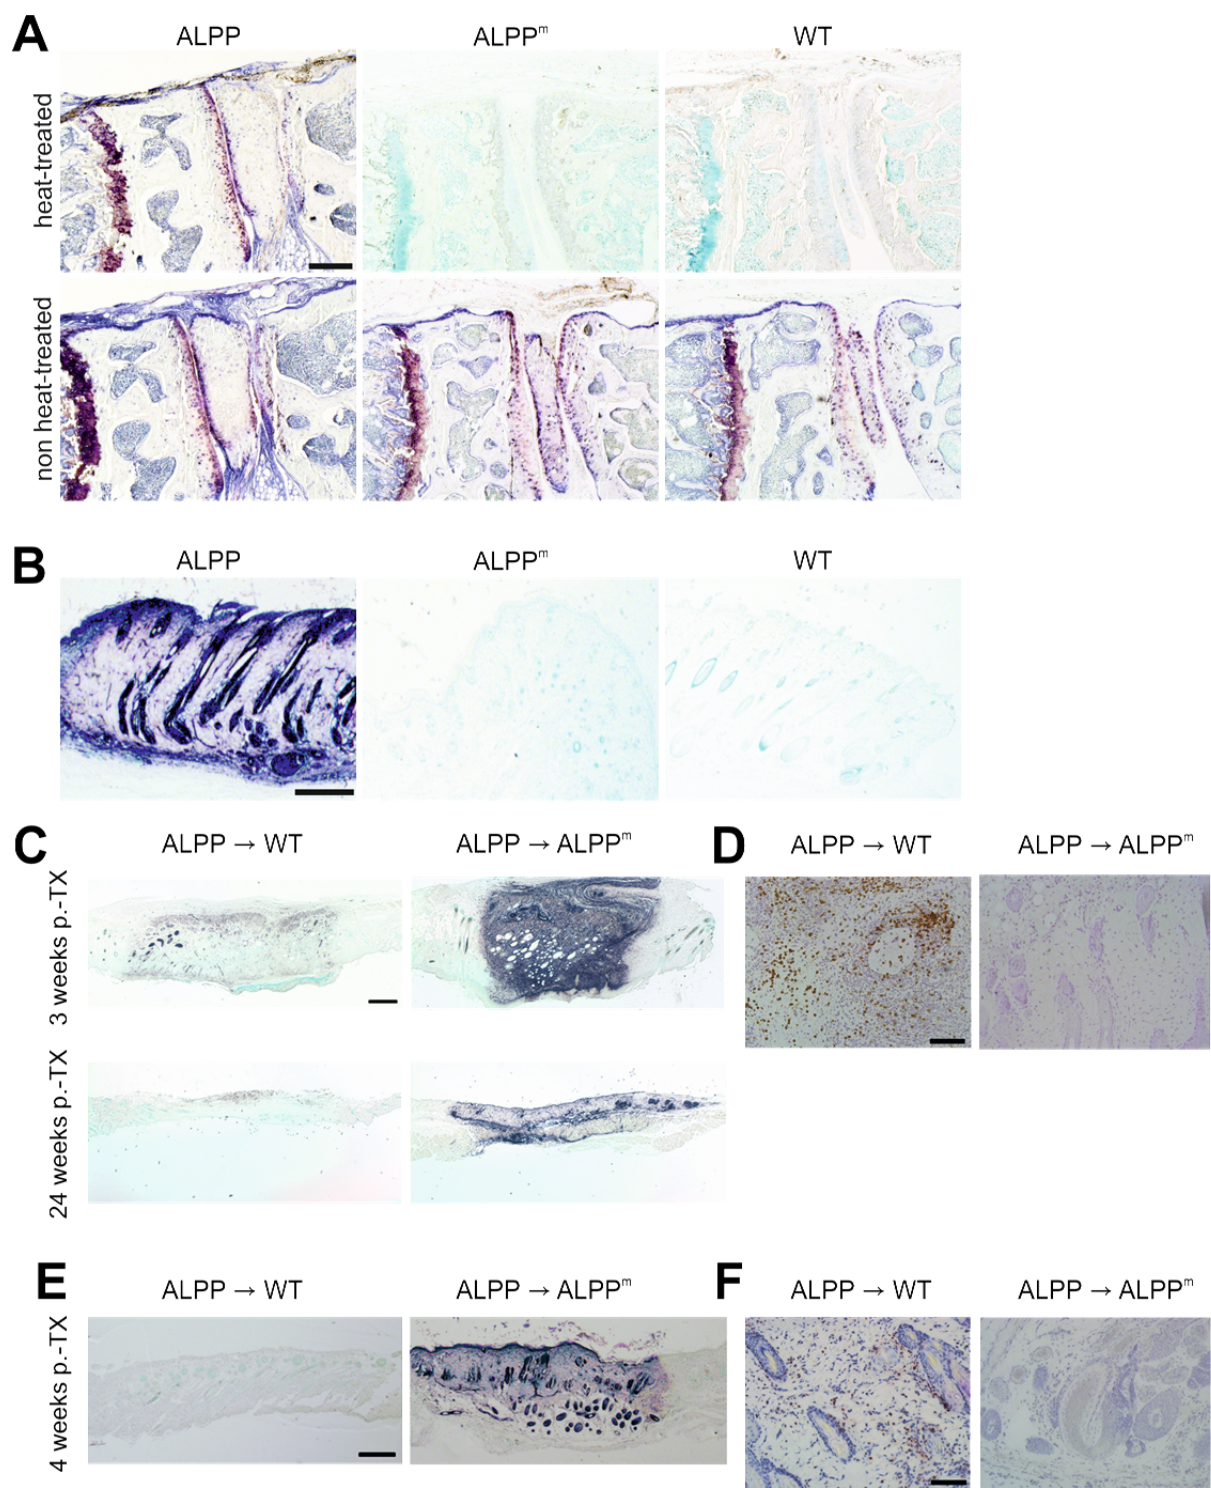

## Supplementary Figure 1, Zwolanek *et al.*

**Supplementary Figure S1.** Histochemical ALPP staining and long-term tolerance of Tg(ALPP<sup>m</sup>) recipients to skin grafts from Tg(ALPP) donors. **(A)** ALPP histochemistry on plastic sections from knee joints of Tg(ALPP), Tg(ALPP<sup>m</sup>), and wild-type mice after a 35-min heat inactivation at 72°C (upper panels) or without heat pretreatment (lower panels). Tg(ALPP) donors show strong staining in all tissues, whereas no enzyme activity could be detected in wild-type and Tg(ALPP<sup>m</sup>) mice upon heat pretreatment. Non heat-treated tissues

show similar enzyme activity in all mouse lines. Scale bar = 100  $\mu\text{m}$ . n = 3 per group. **(B)** ALPP histochemistry of skin sections from Tg(ALPP), Tg(ALPP<sup>m</sup>) and wild-type rats after 35 min heat inactivation at 72°C. Strong ALPP staining was present in Tg(ALPP) rats compared to Tg(ALPP<sup>m</sup>) and wild-type littermates. Scale bar = 100  $\mu\text{m}$ . n = 5 per group. **(C)** Histochemistry of skin grafts from Tg(ALPP) grafts transplanted into Tg(ALPP<sup>m</sup>) recipient mice showing more host tissue as shown in Figure 2B. Scale bar = 500  $\mu\text{m}$ . n = 10 per group. **(D)** Immunohistochemical staining of skin grafts from wild-type and Tg(ALPP<sup>m</sup>) recipient mice using an anti-CD45R antibody, 3 weeks post-surgery. Red-stained cells represent CD45R-positive leukocytes. Scale bar = 100  $\mu\text{m}$ . n  $\geq$  5 per group. **(E)** Histochemistry of skin grafts from Tg(ALPP) rats transplanted into Tg(ALPP<sup>m</sup>) recipient rats showing more host tissue as shown in Figure 2D. Scale bar = 500  $\mu\text{m}$ . n = 10 per group. **(F)** Immunohistochemical staining of skin grafts from wild-type and Tg(ALPP<sup>m</sup>) recipient rats using an anti-CD45 antibody, 4 weeks post-surgery. Red-stained cells represent CD45-positive leukocytes. Scale bar = 100  $\mu\text{m}$  n  $\geq$  5 per group. ALPP<sup>m</sup>, ALPP<sup>E451G</sup> mutant; ALPP  $\rightarrow$  ALPP<sup>m</sup>, transplantation from Tg(ALPP) donor into Tg(ALPP<sup>m</sup>) recipient; TX, transplantation; WT, wild-type.

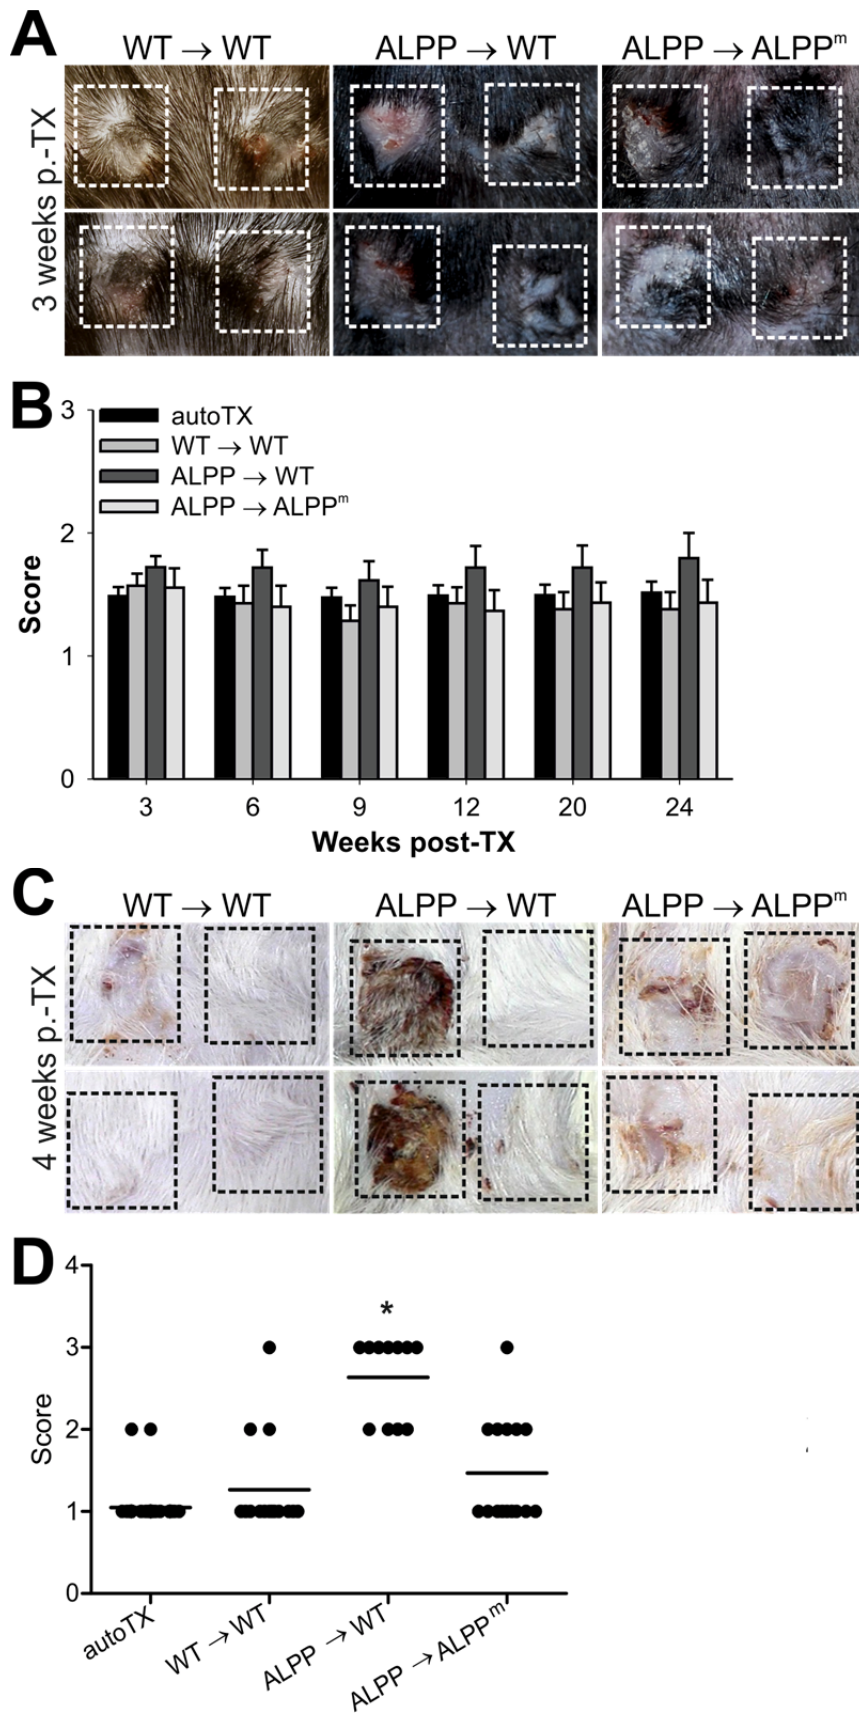

**Supplementary Figure S2.** Macroscopic analysis of skin grafts from Tg(ALPP) donors in mouse and rat marker-tolerant models. **(A)** Macroscopic appearance of skin grafts (white dashed box) of indicated recipient mice, 3 weeks post-transplantation. The left dashed box indicates the donor transplant; the right box indicates the auto-transplant. **(B)** Macroscopic

scoring of skin graft rejection over the 24-week experimental period in mice. No significant differences were observed in the scoring of the transplants. Dots represent score per animal.  $n \geq 10$  per group. Data represent means  $\pm$  SEM. (C) Macroscopic appearance of skin grafts (black dashed box) of indicated recipients in the rat model, 4 weeks post-transplantation. The left dashed box indicates the donor transplant; the right box indicates the auto-transplant. (D) Macroscopic scoring of skin graft rejection in the rat model, showing clear signs of rejection in wild-type recipients. Dots represent score per animal.  $n = 10$  per group. \*  $p < 0.05$  by Kruskal-Wallis test followed by Mann-Whitney U-test. ALPP<sup>m</sup>, ALPP<sup>E451G</sup> mutant; *ALPP*  $\rightarrow$  ALPP<sup>m</sup>, transplantation from Tg(ALPP) donor into Tg(ALPP<sup>m</sup>) recipient; TX, transplantation; WT, wild-type.

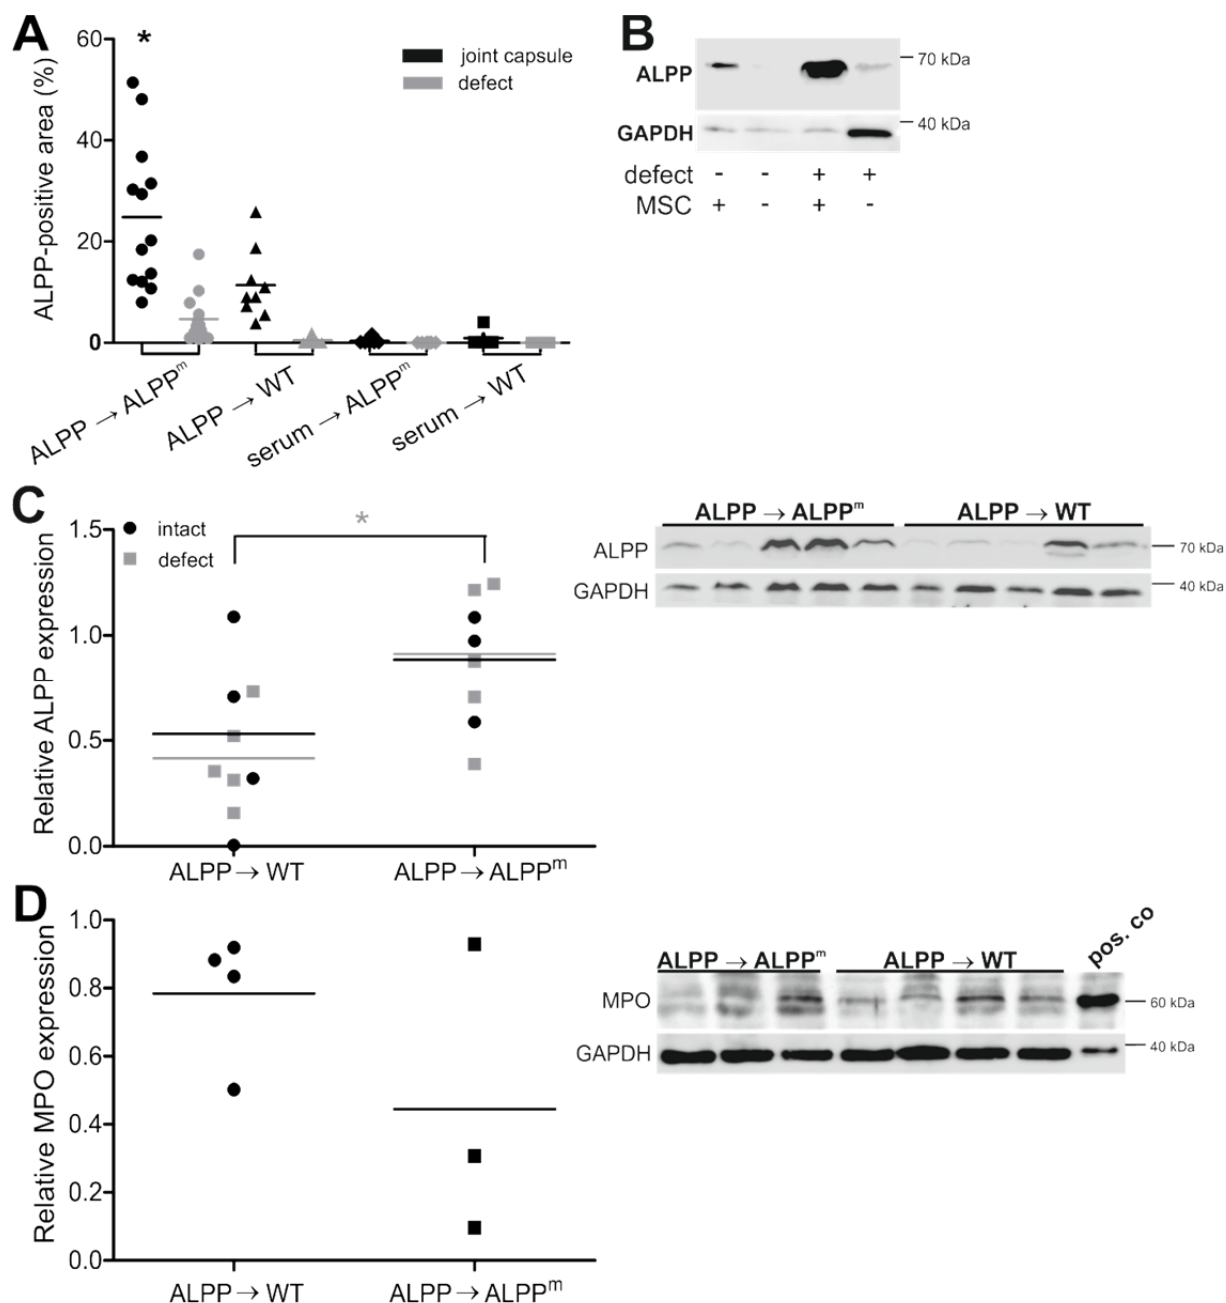

**Supplemental Figure S3.** Rapid rejection of MSC from Tg(ALPP) donors in the knee joint of wild-type recipient rats. (A) Quantification of the ALPP-positive area in the synovium of the joint capsule and within the full-thickness defects after histochemical ALPP staining, 1 day after intra-articular injection of serum or  $10^7$  MSC from Tg(ALPP) donor rats into the knee of wild-type and Tg(ALPP<sup>m</sup>) recipient rats. Dots represent ALPP-positive area per animal.  $n \geq 5$  per group. \*  $p < 0.05$  vs. WT recipients by Kruskal-Wallis test followed by Mann-Whitney U-test. (B) Western blotting analysis of joint capsule extract 1 day after injection of serum or  $10^7$  MSC from Tg(ALPP) donor rats into the knee of Tg(ALPP<sup>m</sup>) recipients. GAPDH was used as loading control.  $n \geq 5$  per group. (C) ALPP protein expression in joint capsule extracts from intact knees and knees carrying a cartilage defect, 1 day after intra-articular injection of MSC from Tg(ALPP) donor rats into Tg(ALPP<sup>m</sup>) or wild-type recipients. GAPDH was used for normalization. \*  $p < 0.05$  by Student's t-test.  $n = 5$  per group. (D) Western blotting analysis of MPO expression in joint capsule extracts, 1 day after intra-articular injection of MSC from Tg(ALPP) donor rats into Tg(ALPP<sup>m</sup>) or wild-type recipi-

ents. GAPDH was used for normalization. Lysates of neutrophils served as positive control.  $n \geq 3$  per group. ALPP<sup>m</sup>, ALPP<sup>E451G</sup> mutant; *ALPP* → ALPP<sup>m</sup>, transplantation from Tg(*ALPP*) donor into Tg(ALPP<sup>m</sup>) recipient; TX, transplantation; MPO, myeloperoxidase; pos. co, positive control; WT, wild-type.



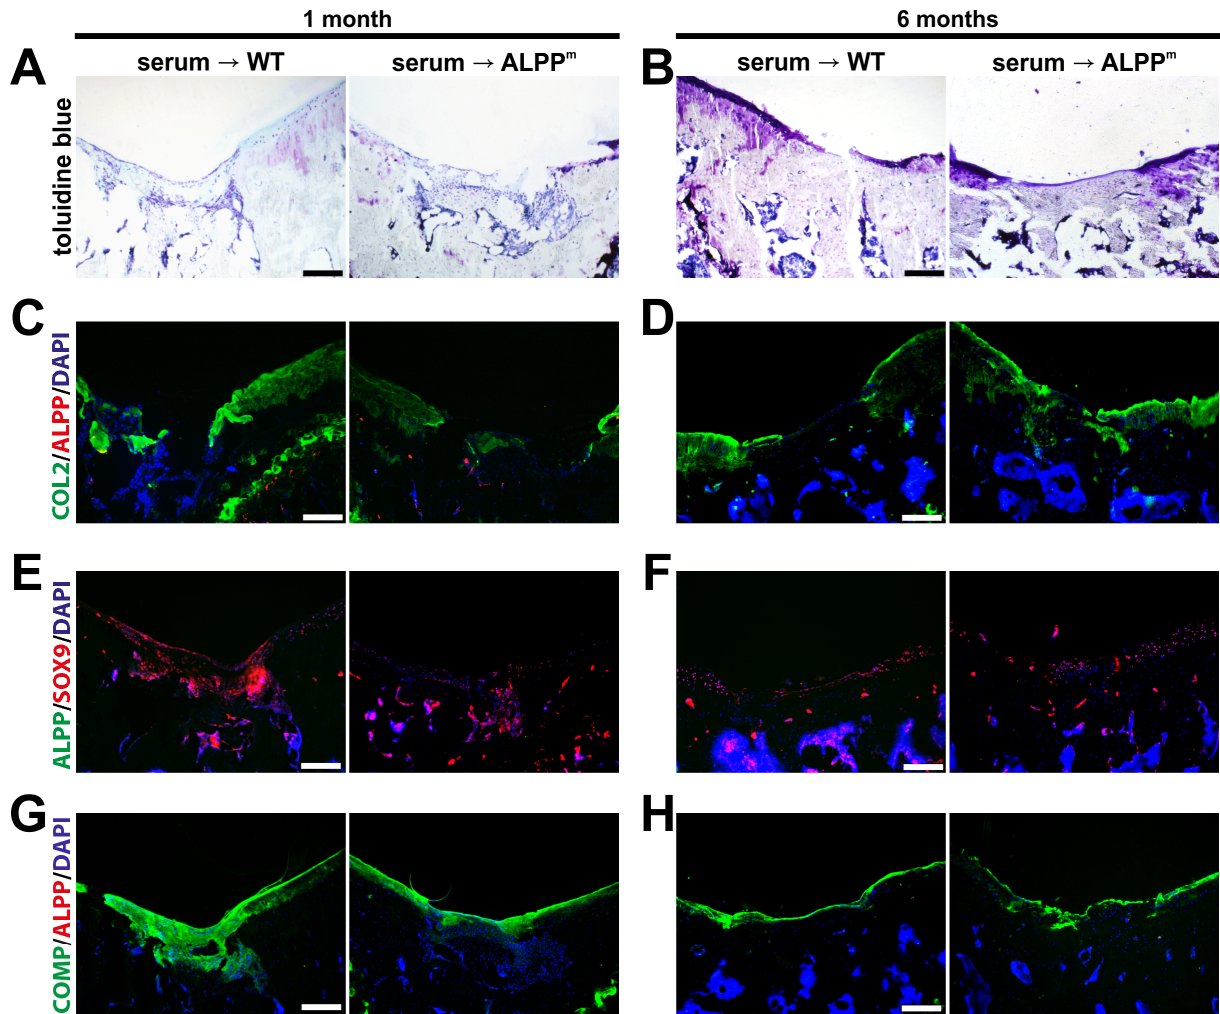

## Supplementary Figure 4, Zwolanek *et al.*

**Supplementary Figure S4.** Serum controls for experiments with intra-articularly injected MSC in wild-type and Tg(ALPP<sup>m</sup>) recipient rats. (**A and B**) Toluidine blue staining of cryosections from full-thickness cartilage defects in the patellar groove, 1 month (left panel) and 6 months (right panel) after injection of 50  $\mu$ L rat serum into the knee joint of wild-type or Tg(ALPP<sup>m</sup>) recipients. No neocartilage formation can be observed at 6 months post-treatment. Scale bar = 50  $\mu$ m. n = 3 (A) and 5 (B) per group. (**C - H**) Immunofluorescence staining of cryosections of full-thickness cartilage defects, using anti-collagen II (green) and anti-ALPP antibodies (red) (**C and D**), anti-ALPP (green) and anti-Sox9 antibodies (red) (**E and F**), or anti-COMP (green) and anti-ALPP antibodies (red) (**G and H**), 1 month (left panels) and 6 months (right panels) after injection of rat serum into wild-type or Tg(ALPP<sup>m</sup>) recipients. Neither COL2-containing cartilaginous neomatrix, nor SOX9 and COMP expression was detectable in the defects of serum-injected wild-type and Tg(ALPP<sup>m</sup>) recipients, 6 months post-injection. No ALPP-expressing cells were found in Tg(ALPP<sup>m</sup>) and wild-type recipients. Scale bar = 50  $\mu$ m. n = 5 per group. ALPP, human placental alkaline phosphatase; ALPP<sup>m</sup>, ALPP<sup>E451G</sup> mutant; ALPP  $\rightarrow$  ALPP<sup>m</sup>, transplantation from Tg(ALPP) donor into Tg(ALPP<sup>m</sup>) recipient; WT, wild-type.



**Supplementary Table 1: PCR products after amplification**

| <b>PCR product</b> | <b>Sequence (5' → 3')</b> |
|--------------------|---------------------------|
| R26S               | GTCGACTAGATGAAGGAGAGC     |
| E3r                | GAGCCACATATGGGAAGCGGT     |
| R26f               | TGAATTCCTGCCTCGCCACTGT    |
| U3Kr               | GAAAGGAGCCTGCCTGGTACC     |
| U3Kf               | GGTACCAGGCAGGCTCCTTTC     |
| 3U1r               | GAGGCAGAATCTCGCTCTGTC     |

**Supplementary Table 2: PCR primers for cloning.** *fw* – forward, *rev* - reverse

| <b>Primer</b> | <b>Direction</b> | <b>Use</b>    | <b>Sequence (5' → 3')</b>            |
|---------------|------------------|---------------|--------------------------------------|
| SOE-f1        | fw               | ΔALPP cloning | TAGCACGTGGGAGACTCCA                  |
| SOE-r1        | rev              | ΔALPP cloning | GTGCCCTGGACGGAGAGACCCACGCAGGCGAGGAC  |
| SOE-f2        | fw               | ΔALPP cloning | TGCGTGGGTCTCTCCGTCCAGGGGCACTGCTGACTG |
| SOE-r2        | rev              | ΔALPP cloning | GAAAGGAGCCTGCCTGGTACC                |
| R26f          | fw               | genotyping    | TGAATTCCTGCCTCGCCACTGT               |
| E2r           | rev              | genotyping    | AAGGCCTGGCTCACTCACCATC               |
| U3f           | fw               | genotyping    | GATGGAGACCATCCTGGCTAAC               |
| U4r           | rev              | genotyping    | GATCTAGTAACGGCCGCCAGTG               |
| E5r           | rev              | screening     | GCTACGCAGCTCATCTCCAA                 |
| E5f           | fw               | screening     | GCTACGCAGCTCATCTCCAA                 |
| E9r           | rev              | screening     | CTCTCAATGGCGTCGTCGAA                 |
| E8f           | fw               | screening     | GATCCACCGAGACTCCACACT                |
| E11r          | rev              | screening     | AGGCCATGACGTGCGCTATGAA               |
| U3f           | fw               | screening     | GATGGAGACCATCCTGGCTAAC               |
| U4r           | rev              | screening     | GATCTAGTAACGGCCGCCAGTG               |

## Supplementary Methods

**Skin graft scoring.** Scoring of grafts to evaluate rejection was performed on the basis of Hedrich (1) with minor modifications. Photographs of mouse allo- and autografts taken 3, 6, 9, 12, 20, and 24 weeks post-surgery and of rat grafts taken 4 weeks post-surgery were randomized and evaluated independently by three experienced observers on the basis of the following scoring: 1 - no signs of rejection, characterized by full grown pelt and original size of graft; 2 - signs of rejection, manifested by reduced number of hairs, cankerous appearance and reduction of graft size and/or dry scrap; 3 - rejection, characterized by reduction of graft to scar. For each graft the mean value of the individual scores given by the observers was used for quantification.

**Immunoblotting.** Joint capsule homogenates (50 – 200 µg) were separated by SDS-PAGE and immunoblotting was carried out using a rabbit polyclonal anti-MPO (myeloperoxidase) antibody (4162S, Cell Signaling). 50 µg lysate of  $1.5 \times 10^6$  neutrophils served as positive control. Anti-GAPDH rabbit antibody (MAB374, Sigma) was used as loading control and for normalization.

## References

1. Hedrich HJ. Testing for Isohistogeneity (Skin Grafting). In: Adams M and Hedrich HJ, eds. *Genetic Monitoring of Inbred Strains of Rats: A Manual on Colony Management, Basic Monitoring Techniques, and Genetic Variants of the Laboratory Rat*. New York: John Wiley & Sons Inc; 1990:102-114.
